# Supplementary material for: First Experimental Evidence for Reversibility of Ammonia Loss from Asparagine
Source: MDPI journal article supplement (doi:10.3390/ijms23158371), 2022-07-28
Supplement: s1 [file s1]

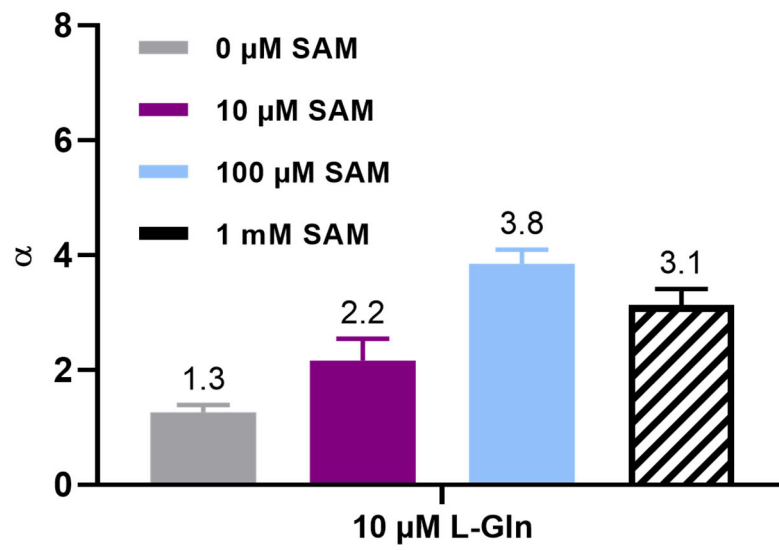

Figure S1. The effect of *S*-adenosylmethionine (SAM) with different concentrations on protein succinimide/isoaspartate ammonia ligase (PSIAL) activity when adding 10 μM glutamine (Gln).
